# Supplementary material
Source: Springer Nature journal article supplement (https://www.springermedizin.de/resource/supplementary/13014_2011_493_MOESM4_ESM.pdf/9633538)

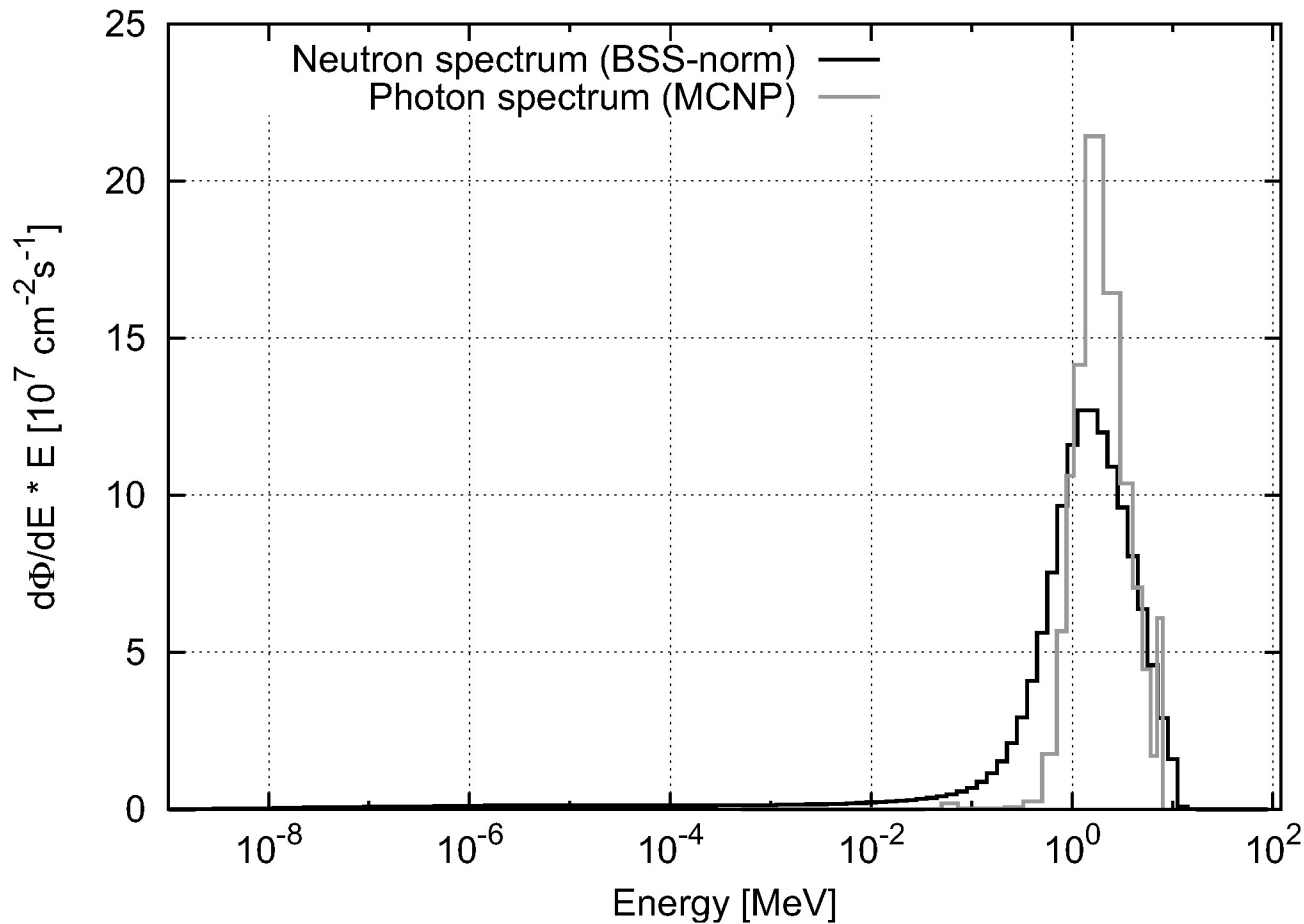

Supplement: MOESM4 [file 9633538]
